# Supplementary material for: A polar rotor for designing antiferroelectricity–antiferromagnetism in a quasi-2D organic–inorganic hybrid perovskite
Source: Royal Society of Chemistry journal article supplement (doi:10.1039/d5qi01473e), 2025-10-10
Supplement: d5qi01473e1.pdf [file d5qi01473e1.pdf]

## Supproting infromation

### **Polar Rotor for Designing Antiferroelectricity-Antiferromagneticty in a Quasi-2D Organic-Inorganic Hybrid Perovskite**

Zi-Ao Qiu,<sup>a</sup> Hua-Kai Li,<sup>a</sup> Ze-Jiang Xu,<sup>a</sup> Liang-Han Shen,<sup>a</sup> Xiang Zhang,<sup>a</sup> Chao Shi,<sup>a</sup> Na Wang,<sup>a</sup> Xiao-Bin Fu,<sup>b</sup> Nian-Tao Yao,<sup>c</sup> Heng-Yun Ye,<sup>a</sup> and Le-Ping Miao<sup>\*a</sup>

<sup>a</sup> Chaotic Matter Science Research Center, International Institute for Innovation, Jiangxi University of Science and Technology, Ganzhou 341000, P.R. China.

<sup>b</sup> National Key Laboratory of Thorium Energy, Shanghai Institute of Applied Physics, Chinese Academy of Science, Shanghai, 201800, China.

<sup>c</sup> National Key Laboratory of Thorium Energy, Shanghai Institute of Applied Physics, Chinese Academy of Science, Shanghai, 201800, China.

*E-mail: L.P.M. (miaoleping@jxust.edu.cn)*

# Supplementary Index

## Note

Calculations of  $\Delta S$  and  $N$  for compound DFCBC and DFCBZ.

## Experimental

Sample preparation

General Measurements

X-ray diffraction experiments

## Supplemental Figures

**Figure S1.** The macroscopic shape of the single crystal of crystal (a) DFCBC and (b) DFCBZ.

**Figure S2.** PXRD patterns of compound (a) DFCBC and (b) DFCBZ.

**Figure S3.** The thermogravimetric (TG) curve of compound (a) DFCBC and (b) DFCBZ.

**Figure S4.** (a) DSC curves of CBC at 285–325 K.(b) DSC curves of CBZ at 240–320 K.

**Figure S5.** Perovskite structure of DFCBZ at LTP and HTP.

**Figure S6.** Comparison of simulated and experimental variable-temperature PXRD patterns of DFCBC.

**Figure S7.** Zn–Cl bond length and Cl–Zn–Cl bond angle in DFCBZ in (a) LTP and (b) HTP.

**Figure S8.**  $\epsilon'$  and curves of the heating and cooling cycles of (a) DFCBC and (b)DFCBZ at different frequencies.

**Figure S9.** (a) Temperature dependence of  $P$ – $E$  hysteresis loops of DFCBZ at 50 Hz. (b) Schematic diagram for the calculation of energy storage properties of antiferroelectric materials at 333 K.

**Figure S10.** Temperature-dependent susceptibilities under a dc field of 1 kOe and Curie–Weiss fitted curves for DFCBC.

## Supplemental Tables

**Table S1.** Crystal Data and Structure Refinement Details for DFCBC and CBC.

**Table S2.** Crystal Data and Structure Refinement Details for DFCBZ and CBZ.

**Table S3.** Selected bond lengths [ $\text{\AA}$ ] for DFCBC at 300 and 383 K.

**Table S4.** Selected bond lengths [ $\text{\AA}$ ] for DFCBZ at 300 and 373 K.

**Table S5.** Bond lengths [ $\text{\AA}$ ] of the hydrogen bond at 300 K of DFCBC.

**Table S6.** Bond lengths [ $\text{\AA}$ ] of the hydrogen bond at 383 K of DFCBC.

**Table S7.** Bond lengths [ $\text{\AA}$ ] of the hydrogen bond at 300 K of DFCBZ.

**Table S8.** Bond lengths [ $\text{\AA}$ ] of the hydrogen bond at 373 K of DFCBZ.

## Note

Calculations of  $\Delta S$  and  $N$  for compound DFCBC (Note S1) and DFCBZ (Note S2).

Compound DFCBC

$\Delta S$

$$= \int_{T_1}^{T_2} \frac{Q}{T} dT \approx \frac{\Delta H}{T_c} = \frac{3.164 J \cdot g^{-1} \times 833.91 g \cdot mol^{-1}}{358.55 K} = \frac{2638.49 J \cdot mol^{-1}}{358.55 K} \approx 7.36$$

$$\Delta S = R \ln N$$

$$N = \exp\left(\frac{\Delta S}{R}\right) = \exp\left(\frac{7.36 J \cdot mol^{-1} \cdot K^{-1}}{8.314 J \cdot mol^{-1} \cdot K^{-1}}\right) = 2.42$$

Compound DFCBZ

$\Delta S$

$$= \int_{T_1}^{T_2} \frac{Q}{T} dT \approx \frac{\Delta H}{T_c} = \frac{3.841 J \cdot g^{-1} \times 846.79 g \cdot mol^{-1}}{373 K} = \frac{3252.52 J \cdot mol^{-1}}{373 K} \approx 8.72$$

$$\Delta S = R \ln N$$

$$N = \exp\left(\frac{\Delta S}{R}\right) = \exp\left(\frac{8.72 J \cdot mol^{-1} \cdot K^{-1}}{8.314 J \cdot mol^{-1} \cdot K^{-1}}\right) = 2.85$$

## Experimental

Sample preparation:

Materials:  $C_4H_7F_2N \cdot HCl$  ( $\geq 99\%$ , Shanghai Shanghai Titan Technology Co., Ltd.).  $C_4H_{10}ClN$  ( $\geq 98\%$ , Shanghai Shanghai Titan Technology Co., Ltd.).  $CoCl_2$  ( $\geq 98\%$ , Shanghai Titan Technology Co., Ltd.).  $ZnCl_2$  ( $\geq 98\%$ , Shanghai Shanghai Titan Technology Co., Ltd.).  $HCl$  (36% ~ 38%, Jiangxi Xinguang Electronic Technology Co., Ltd.). All chemicals are commercially available and used directly without purification.

Synthesis of compound DFCBC:  $C_4H_7F_2N \cdot HCl$  has a 2:1 stoichiometric ratio to cobalt chloride. The  $HCl$  (36% ~ 38%) solution as the solvent and slowly evaporated on a constant temperature heating table at 313 K. After about three days, DFCBC crystals containing precipitated crystals were obtained.

Synthesis of compound DFCBZ:  $C_4H_7F_2N \cdot HCl$  Hydrochloride has a 2:1 stoichiometric ratio to zinc chloride. The HCl (36% ~ 38%) solution as the solvent and slowly evaporated on a constant temperature heating table at 313 K. After about three days, DFCBZ crystals containing precipitated crystals were obtained.

Synthesis of compound CBC:  $C_4H_{10}ClN$  has a 2:1 stoichiometric ratio to cobalt chloride. The HCl (36% ~ 38%) solution as the solvent and slowly evaporated on a constant temperature heating table at 313 K. After about two days, DFCBZ crystals containing precipitated crystals were obtained.

Synthesis of compound CBZ:  $C_4H_{10}ClN$  has a 2:1 stoichiometric ratio to zinc chloride. The HCl (36% ~ 38%) solution as the solvent and slowly evaporated on a constant temperature heating table at 313 K. After about two days, DFCBZ crystals containing precipitated crystals were obtained.

General measurements:

The Powder X-ray Diffraction (PXRD) were measured at a measurement angle of  $5^\circ$ – $50^\circ$  and a scan rate of  $5^\circ/\text{min}$  on Rigaku D/MAX 2000 PC X-ray diffractometer. And the X-ray wavelength is 0.15406 nm.

Thermogravimetric (TG) was measured on a NETZSCH STA2500 instrument under a nitrogen atmosphere with a heating rate of 10 K/min.

Differential scanning calorimetry (DSC) tests were performed in a nitrogen atmosphere using a DSC 214 Polyma instrument at a heating/cooling rate of 10 K/min.

Dielectric measurement: For dielectric measurements, the powder samples were used as the plate with a thickness of around 0.5 mm and an area of around  $5 \text{ mm}^2$ . Carbon conducting paste deposited on the plate surfaces was used as electrodes. A Tonghui TH2828A impedance analyzer was used to measure the dielectric constants.

The variable temperature  $P$ – $E$  hysteresis loops of DFCBC were performed on the thin crystal ( $0.5160 \text{ mm} \times 0.106 \text{ mm}$ ) through a Radiant Precision Premier II instrument was used to measure.

Magnetic measurements were performed with a Quantum Design SQUID magnetometer (MPMSXL-7) magnetometer. The diamagnetic contribution calculated from Pascal constants was corrected in the data.

X-ray diffraction experiments:

Single-crystal X-ray diffraction studies were recorded on a Rigaku synergy diffractometer using the  $\omega$  scan technique with Mo-K $\alpha$  ( $\lambda = 0.71073 \text{ \AA}$ ) radiation. All structures are solved using direct methods and refined using the full matrix least squares technique in the SHELX2016 package. At high-temperature phase, the space groups were chosen according to the Aizu principle. The organic cations were not modeled according to its chemical sense, because of the highly disordered form at high-temperature phase. Detailed crystallographic data are recorded in Tables S1–S8.

### Supplemental Figures

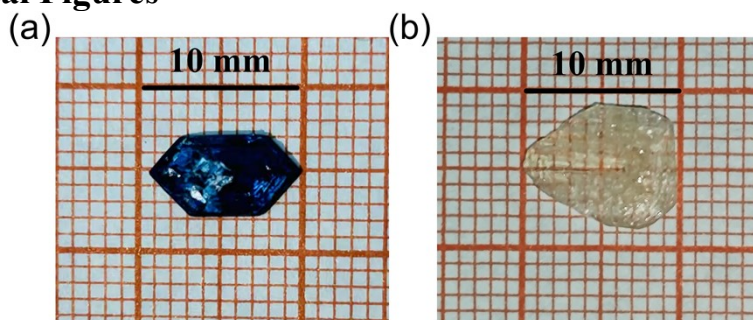

**Figure S1.** The macroscopic shape of the single crystal of crystal (a) DFCBC and (b) DFCBZ.

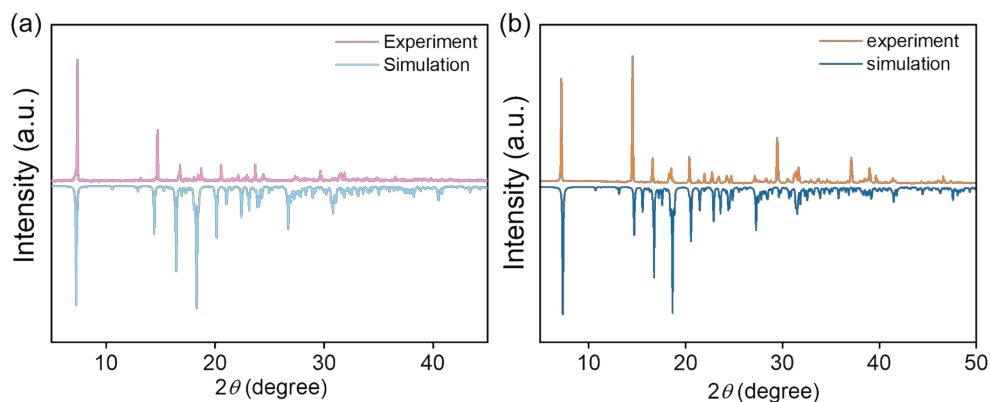

**Figure S2.** PXRD patterns of compound (a) DFCBC and (b) DFCBZ.

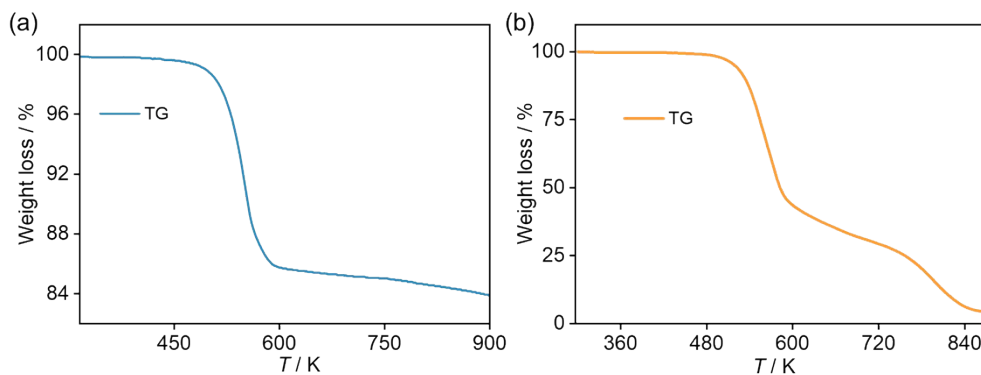

**Figure S3.** The thermogravimetric (TG) curve of compound (a) DFCBC and (b) DFCBZ.

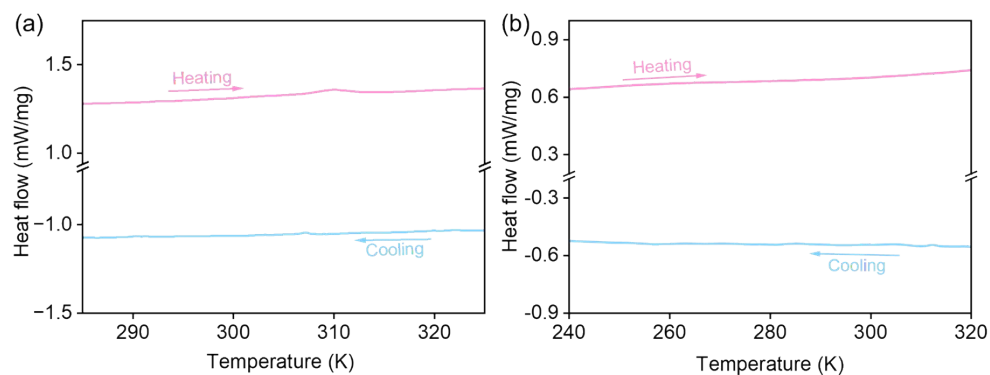

**Figure S4.** (a) DSC curves of CBC at 285–325 K. (b) DSC curves of CBZ at 240–320 K.

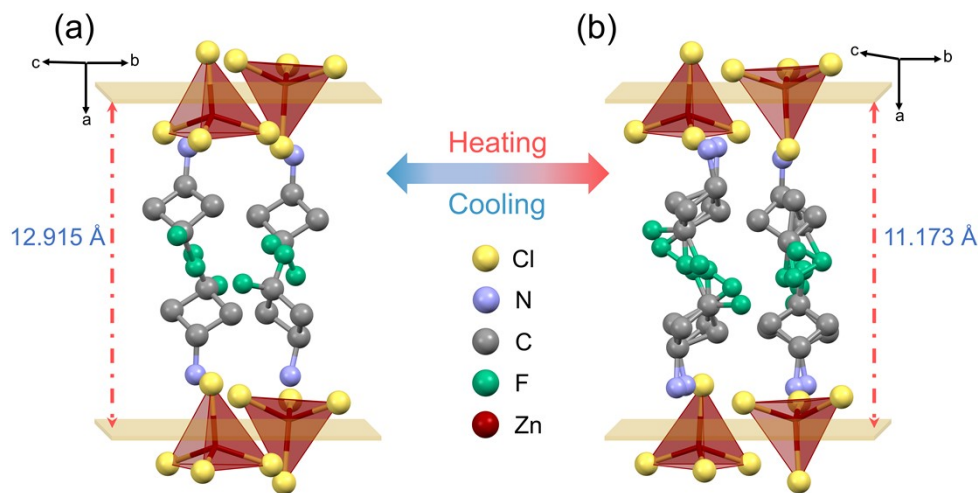

**Figure S5.** Perovskite structure of DFCBZ at (a) LTP and (b) HTP.

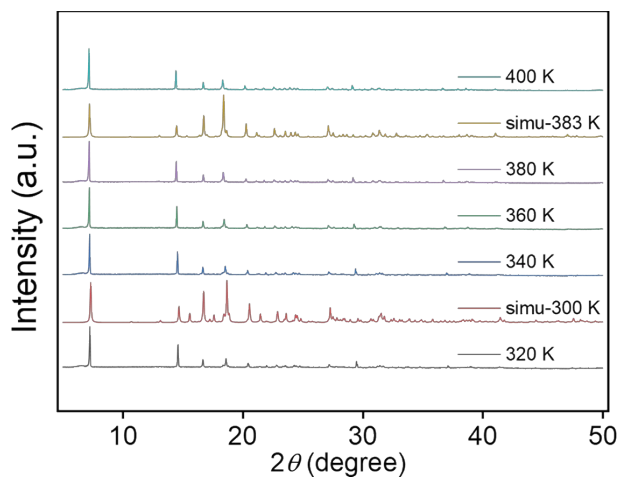

**Figure S6.** Comparison of simulated and experimental variable-temperature PXRD patterns of DFCBC.

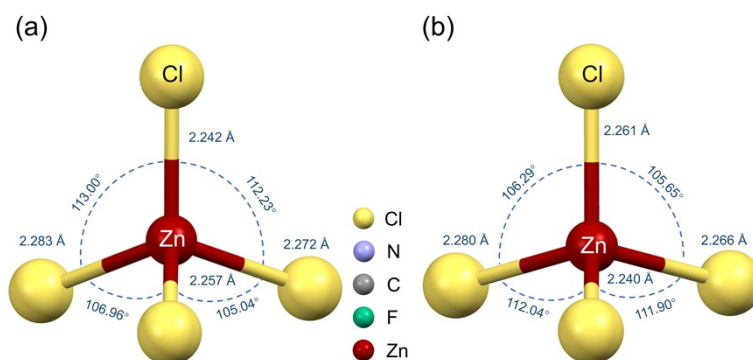

**Figure S7.** Zn-Cl bond length and Cl-Zn-Cl bond angle in DFCBZ in (a) LTP and (b) HTP.

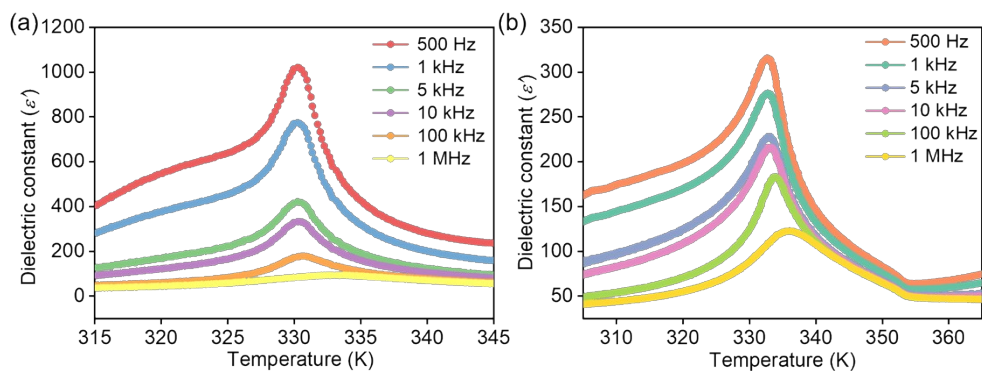

**Figure S8.**  $\epsilon'$  and curves of the heating and cooling cycles of (a) DFCBC and (b) DFCBZ at different frequencies.



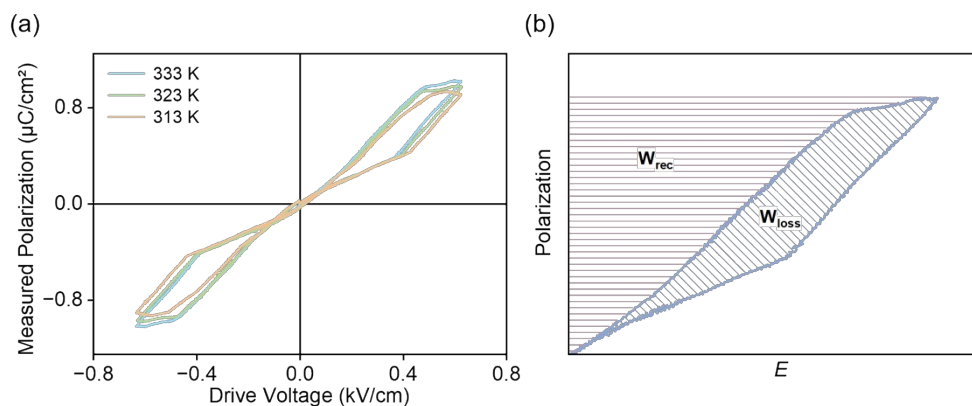

**Figure S9.** (a) Temperature dependence of  $P$ – $E$  hysteresis loops of DFCBZ at 50 Hz. (b) Schematic diagram for the calculation of energy storage properties of antiferroelectric materials at 333 K.

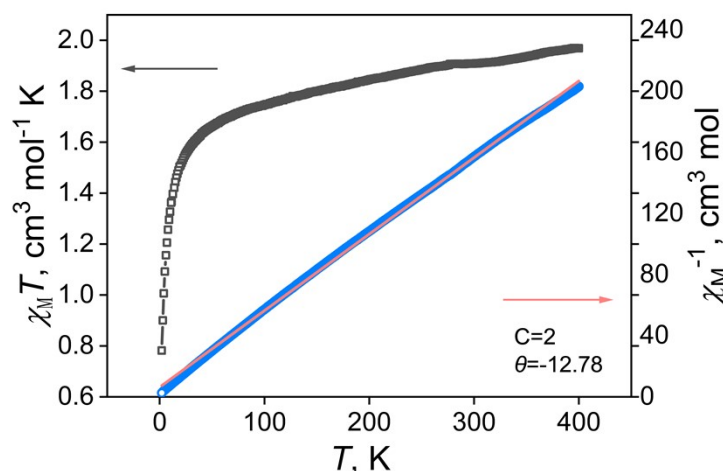

**Figure S10.** Temperature-dependent susceptibilities under a dc field of 1 kOe and Curie–Weiss fitted curves for DFCBC.

## Supplemental Tables

**Table S1.** Crystal Data and Structure Refinement Details for DFCBC and CBC.

|                   | DFCBC                   |                         | CBC                  |
|-------------------|-------------------------|-------------------------|----------------------|
| $T / K$           | 300                     | 383                     | 300                  |
| Formula weight    | 414.96                  | 416.96                  | 344.99               |
| Empirical formula | $C_8H_{16}Cl_4CoF_4N_2$ | $C_8H_{14}Cl_4CoF_4N_2$ | $C_8H_{17}Cl_4CoN_2$ |
| Crystal system    | monoclinic              | monoclinic              | monoclinic           |
| Space group       | $P2_1/n$                | $P2_1/c$                | $P\bar{1}$           |
| $a / \text{\AA}$  | 11.9748(7)              | 12.2354(8)              | 7.2435(9)            |
| $b / \text{\AA}$  | 11.3663(7)              | 11.5412(8)              | 10.7297(12)          |
| $c / \text{\AA}$  | 24.1353(14)             | 11.9953(8)              | 11.8556(16)          |

|                                                          |                |                |                |
|----------------------------------------------------------|----------------|----------------|----------------|
| $\alpha / ^\circ$                                        | 90             | 90             | 67.178(12)     |
| $\beta / ^\circ$                                         | 91.858(5)      | 92.485(6)      | 75.090(12)     |
| $\gamma / ^\circ$                                        | 90             | 90             | 81.855(10)     |
| $V / \text{\AA}^3$                                       | 3283.3(3)      | 1692.3(2)      | 819.79(19)     |
| $Z$                                                      | 8              | 4              | 2              |
| $D_{\text{calc}} / \text{g}\cdot\text{cm}^{-3}$          | 1.687          | 1.637          | 1.398          |
| $\mu / \text{mm}^{-1}$                                   | 1.722          | 1.671          | 1.675          |
| $F(000)$                                                 | 1696.0         | 836.0          | 354.0          |
| $2\theta \text{ range} / ^\circ$                         | 3.848–50.054   | 4.854–61.87    | 4.124–50.052   |
| Reflns collected                                         | 21028          | 12154          | 8028           |
| Independent reflns ( $R_{\text{int}}$ )                  | 55815 (0.0535) | 4267 (0.0319)  | 2898 (0.0803)  |
| No. of parameters                                        | 347            | 248            | 138            |
| $R_1^{[\text{a}]}, wR_2^{[\text{b}]} [I > 2\sigma(I)]$   | 0.0969, 0.3310 | 0.0484, 0.1295 | 0.0686, 0.1752 |
| $R_1, wR_2$ [all data]                                   | 0.1280, 0.3539 | 0.0996, 0.1493 | 0.1442, 0.2101 |
| GOF                                                      | 1.190          | 1.008          | 1.014          |
| $\Delta\rho^{[\text{c}]} / \text{e}\cdot\text{\AA}^{-3}$ | 2.56, –1.33    | 0.44, –0.31    | 0.64, –0.38    |
| CCDC                                                     | 2450180        | 2450181        | 2450182        |

<sup>[a]</sup>  $R_1 = \Sigma||F_o| - |F_c||/|F_o|$ ; <sup>[b]</sup>  $wR_2 = [\Sigma w(F_o^2 - F_c^2)^2]/\Sigma w(F_o^2)^2]^{1/2}$ ; <sup>[c]</sup> maximum and minimum residual electron density.

**Table S2.** Crystal Data and Structure Refinement Details for DFCBZ and CBZ.

|                                                 | DFCBZ                                                             |                                                                   | CBZ                                        |
|-------------------------------------------------|-------------------------------------------------------------------|-------------------------------------------------------------------|--------------------------------------------|
| $T / K$                                         | 300                                                               | 373                                                               | 300                                        |
| Formula weight                                  | 423.42                                                            | 423.42                                                            | 331.29                                     |
| Empirical formula                               | $\text{C}_8\text{H}_{16}\text{Cl}_4\text{F}_4\text{N}_2\text{Zn}$ | $\text{C}_8\text{H}_{16}\text{Cl}_4\text{F}_4\text{N}_2\text{Zn}$ | $\text{C}_8\text{Cl}_4\text{N}_2\text{Zn}$ |
| Crystal system                                  | monoclinic                                                        | monoclinic                                                        | monoclinic                                 |
| Space group                                     | $P2_1/n$                                                          | $P2_1/c$                                                          | $P\bar{1}$                                 |
| $a / \text{\AA}$                                | 11.9762(4)                                                        | 12.2125(11)                                                       | 7.2353(5)                                  |
| $b / \text{\AA}$                                | 11.3823(4)                                                        | 11.5496(12)                                                       | 10.7252(7)                                 |
| $c / \text{\AA}$                                | 24.1133(9)                                                        | 12.0034(9)                                                        | 11.8483(9)                                 |
| $\alpha / ^\circ$                               | 90                                                                | 90                                                                | 67.005(7)                                  |
| $\beta / ^\circ$                                | 91.908(3)                                                         | 92.476(8)                                                         | 75.112(6)                                  |
| $\gamma / ^\circ$                               | 90                                                                | 90                                                                | 81.985(6)                                  |
| $V / \text{\AA}^3$                              | 3285.2(2)                                                         | 1691.5(3)                                                         | 817.17(11)                                 |
| $Z$                                             | 8                                                                 | 4                                                                 | 2                                          |
| $D_{\text{calc}} / \text{g}\cdot\text{cm}^{-3}$ | 1.712                                                             | 1.663                                                             | 1.346                                      |

|                                                          |                |                |                |
|----------------------------------------------------------|----------------|----------------|----------------|
| $\mu / \text{mm}^{-1}$                                   | 2.172          | 2.109          | 2.130          |
| $F(000)$                                                 | 1696.0         | 848.0          | 320.0          |
| $2\theta \text{ range} / ^\circ$                         | 4.922–61.488   | 4.856–61.332   | 4.13–61.658    |
| Reflns collected                                         | 24811          | 11572          | 11445          |
| Independent reflns ( $R_{\text{int}}$ )                  | 10239 (0.029)  | 5238 (0.0267)  | 5137 (0.0447)  |
| No. of parameters                                        | 347            | 258            | 136            |
| $R_1^{[\text{a}]}, wR_2^{[\text{b}]} [I > 2\sigma(I)]$   | 0.0892, 0.2948 | 0.0616, 0.2085 | 0.0563, 0.1629 |
| $R_1, wR_2$ [all data]                                   | 0.1120, 0.3104 | 0.0903, 0.2305 | 0.1151, 0.1884 |
| GOF                                                      | 1.023          | 1.060          | 0.971          |
| $\Delta\rho^{[\text{c}]} / \text{e}\cdot\text{\AA}^{-3}$ | 2.80, –1.45    | 0.86, –0.82    | 0.72, –0.30    |
| CCDC                                                     | 2450183        | 2450184        | 2450185        |

<sup>[\text{a}]</sup>  $R_1 = \Sigma||F_o| - |F_c||/|F_o|$ ; <sup>[\text{b}]</sup>  $wR_2 = [\Sigma w(F_o^2 - F_c^2)^2]/\Sigma w(F_o^2)^2]^{1/2}$ ; <sup>[\text{c}]</sup> maximum and minimum residual electron density.

**Table S3.** Selected bond lengths [ $\text{\AA}$ ] for DFCBC at 300 and 383 K.

|             |             |         |             |
|-------------|-------------|---------|-------------|
| DFCBC-300 K |             |         |             |
| Co1–Cl1     | 2.256 (3)   | Co1–Cl6 | 2.286 (3)   |
| Co1–Cl2     | 2.266 (3)   | Co1–Cl7 | 2.252 (3)   |
| Co2–Cl4     | 2.263 (3)   | Co2–Cl8 | 2.287 (3)   |
| Co2–Cl5     | 2.272 (3)   | Co2–Cl3 | 2.253 (3)   |
| DFCBC-383 K |             |         |             |
| Co1–Cl1     | 2.2498 (12) | Co1–Cl2 | 2.2593 (13) |
| Co1–Cl3     | 2.2640 (13) | Co1–Cl4 | 2.2786 (13) |

**Table S4.** Selected bond lengths [ $\text{\AA}$ ] for DFCBZ at 300 and 373 K.

|             |             |         |             |
|-------------|-------------|---------|-------------|
| DFCBZ-300 K |             |         |             |
| Zn1–Cl1     | 2.242 (2)   | Zn2–Cl5 | 2.272 (2)   |
| Zn1–Cl2     | 2.2582 (18) | Zn2–Cl6 | 2.2418 (19) |
| Zn1–Cl3     | 2.272 (2)   | Zn2–Cl7 | 2.2571 (18) |
| Zn1–Cl4     | 2.287 (2)   | Zn2–Cl8 | 2.283 (2)   |
| DFCBZ-373 K |             |         |             |

|         |             |         |             |
|---------|-------------|---------|-------------|
| Zn1–Cl1 | 2.2402 (13) | Zn1–Cl3 | 2.2613 (14) |
| Zn1–Cl2 | 2.2662 (14) | Zn1–Cl4 | 2.2799 (15) |

**Table S5.** Bond lengths [Å] of the hydrogen bond at 300 K of DFCBC.

| <i>D–H···A</i> | <i>D–H</i> | <i>H···A</i> | <i>D···A</i> | <i>D–H···A</i> |
|----------------|------------|--------------|--------------|----------------|
| N1–H1A···Cl6   | 0.89       | 2.35         | 3.239(8)     | 173            |
| N1–H1B···Cl5   | 0.89       | 2.47         | 3.226(9)     | 144            |
| N1–H1C···Cl1   | 0.89       | 2.56         | 3.286(8)     | 139            |
| N1–H1C···Cl2   | 0.89       | 2.73         | 3.420(9)     | 135            |
| N2–H2A···Cl8   | 0.89       | 2.69         | 3.455(9)     | 145            |
| N2–H2B···Cl4   | 0.89       | 2.33         | 3.203(8)     | 167            |
| N2–H2C···Cl6   | 0.89       | 2.80         | 3.583(9)     | 148            |
| N3–H3A···Cl6   | 0.89       | 2.59         | 3.426(10)    | 156            |
| N3–H3B···Cl1   | 0.89       | 2.30         | 3.155(10)    | 161            |
| N3–H3C···Cl4   | 0.89       | 2.82         | 3.335(9)     | 118            |
| N4–H4A···Cl2   | 0.89       | 2.40         | 3.225(8)     | 153            |
| N4–H4B···Cl4   | 0.89       | 2.73         | 3.259(8)     | 119            |
| N4–H4B···Cl5   | 0.89       | 2.53         | 3.346(8)     | 153            |
| N4–H4C···Cl8   | 0.89       | 2.40         | 3.266(8)     | 164            |

**Table S6.** Bond lengths [Å] of the hydrogen bond at 383 K of DFCBC.

| <i>D–H···A</i> | <i>D–H</i> | <i>H···A</i> | <i>D···A</i> | <i>D–H···A</i> |
|----------------|------------|--------------|--------------|----------------|
| N1–H1A···Cl3   | 0.89       | 2.41         | 3.243(4)     | 157            |
| N1–H1B···Cl2   | 0.89       | 2.81         | 3.321(4)     | 118            |
| N1–H1B···Cl3   | 0.89       | 2.55         | 3.389(4)     | 157            |
| N1–H1C···Cl4   | 0.89       | 2.40         | 3.250(4)     | 161            |
| N2–H2A···Cl4   | 0.89       | 2.67         | 3.468(4)     | 150            |
| N2–H2B···Cl2   | 0.89       | 2.32         | 3.199(4)     | 169            |

**Table S7.** Bond lengths [ $\text{\AA}$ ] of the hydrogen bond at 300 K of DFCBZ.

| $D-H\cdots A$       | $D-H$ | $H\cdots A$ | $D\cdots A$ | $D-H\cdots A$ |
|---------------------|-------|-------------|-------------|---------------|
| N1-H1A $\cdots$ C14 | 0.89  | 2.61        | 3.423(8)    | 152           |
| N1-H1B $\cdots$ C17 | 0.89  | 2.34        | 3.330(8)    | 120           |
| N1-H1C $\cdots$ C12 | 0.89  | 2.34        | 3.172(7)    | 156           |
| N2-H2A $\cdots$ C18 | 0.89  | 2.69        | 3.439(7)    | 142           |
| N2-H2B $\cdots$ C14 | 0.89  | 2.79        | 3.606(7)    | 152           |
| N2-H2C $\cdots$ C17 | 0.89  | 2.33        | 3.194(7)    | 163           |
| N3-H3A $\cdots$ C14 | 0.89  | 2.36        | 3.235(7)    | 168           |
| N3-H3B $\cdots$ C12 | 0.89  | 2.67        | 3.298(7)    | 129           |
| N3-H3B $\cdots$ C13 | 0.89  | 2.64        | 3.416(6)    | 146           |
| N3-H3C $\cdots$ C15 | 0.89  | 2.42        | 3.231(6)    | 152           |
| N4-H4A $\cdots$ C13 | 0.89  | 2.42        | 3.232(6)    | 151           |
| N4-H4B $\cdots$ C18 | 0.89  | 2.38        | 3.255(7)    | 168           |
| N4-H4C $\cdots$ C15 | 0.89  | 2.55        | 3.350(6)    | 150           |
| N4-H4C $\cdots$ C17 | 0.89  | 2.71        | 3.276(7)    | 123           |

**Table S8.** Bond lengths [ $\text{\AA}$ ] of the hydrogen bond at 373 K of DFCBZ.

| $D-H\cdots A$       | $D-H$ | $H\cdots A$ | $D\cdots A$ | $D-H\cdots A$ |
|---------------------|-------|-------------|-------------|---------------|
| N1-H1A $\cdots$ C12 | 0.89  | 2.47        | 3.245(4)    | 146           |
| N1-H1B $\cdots$ C14 | 0.89  | 2.37        | 3.257(5)    | 179           |
| N1-H1C $\cdots$ C12 | 0.89  | 2.66        | 3.385(4)    | 139           |
| N1-H1C $\cdots$ C13 | 0.89  | 2.65        | 3.318(5)    | 133           |
| N2-H2A $\cdots$ C14 | 0.89  | 2.79        | 3.551(14)   | 144           |
| N2-H2B $\cdots$ C14 | 0.89  | 2.80        | 3.575(12)   | 146           |
| N2-H2C $\cdots$ C13 | 0.89  | 2.35        | 3.227(16)   | 169           |
